# Supplementary material for: Improved glycemic control with minimal systemic metformin exposure: Effects of Metformin Delayed-Release (Metformin DR) targeting the lower bowel over 16 weeks in a randomized trial in subjects with type 2 diabetes
Source: PubMed Central journal article supplement (PMC6155522; doi:10.1371/journal.pone.0203946), 2018-09-25
Supplement: pone.0203946.s002.pdf [file pone.0203946.s002.pdf]

**Washout  
if on  
metformin<sup>1</sup>**  
  
**~60-90 days**

**Screening**

**Placebo  
lead-in<sup>2</sup>**  
(2 weeks)

**Week**

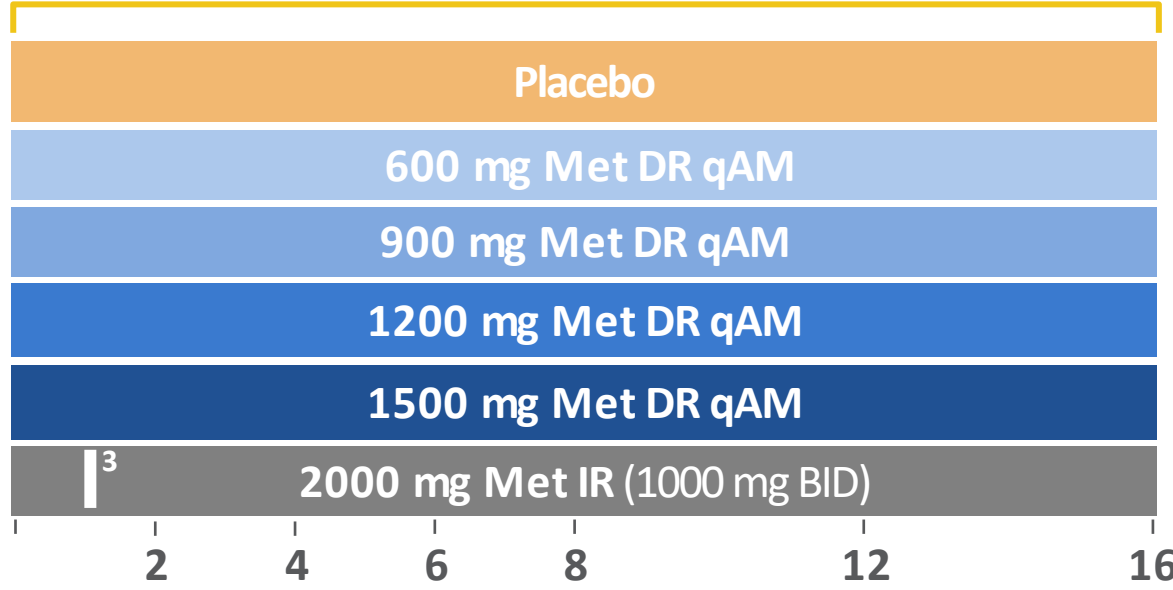

**Double-Blind**

**Single-Blind  
Reference**
