# Supplementary material for: Improved glycemic control with minimal systemic metformin exposure: Effects of Metformin Delayed-Release (Metformin DR) targeting the lower bowel over 16 weeks in a randomized trial in subjects with type 2 diabetes
Source: PubMed Central journal article supplement (PMC6155522; doi:10.1371/journal.pone.0203946), 2018-09-25
Supplement: pone.0203946.s003.pdf [file pone.0203946.s003.pdf]

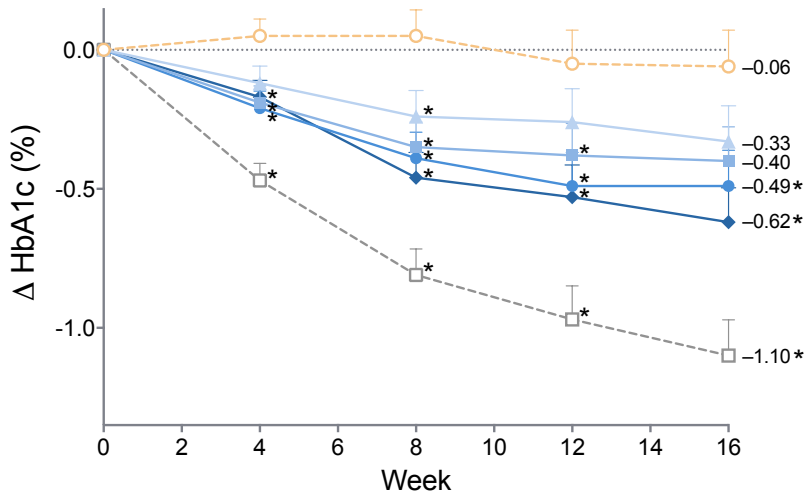

- Placebo (N=90); BL=8.6%
- 1200 mg Met DR (N=88); BL=8.7%
- ▲ 600 mg Met DR (N=88); BL=8.6%
- ◆ 1500 mg Met DR (N=94); BL=8.7%
- 900 mg Met DR (N=93); BL=8.7%
- 2000 mg Met IR (N=89); BL=8.6%

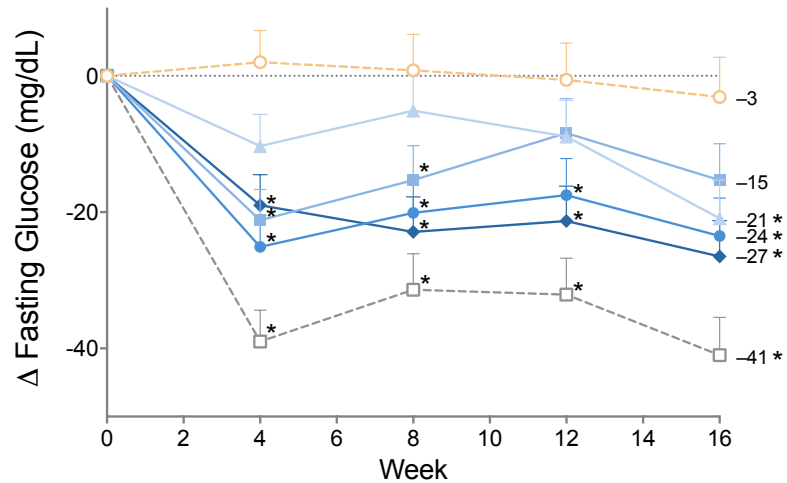

- Placebo (N=90); BL=206 mg/dL
- 1200 mg Met DR (N=88); BL=203 mg/dL
- ▲ 600 mg Met DR (N=88); BL=204 mg/dL
- ◆ 1500 mg Met DR (N=94); BL=213 mg/dL
- 900 mg Met DR (N=93); BL=202 mg/dL
- 2000 mg Met IR (N=89); BL=202 mg/dL
