# Supplementary material for: Improved glycemic control with minimal systemic metformin exposure: Effects of Metformin Delayed-Release (Metformin DR) targeting the lower bowel over 16 weeks in a randomized trial in subjects with type 2 diabetes
Source: PubMed Central journal article supplement (PMC6155522; doi:10.1371/journal.pone.0203946), 2018-09-25

## Non-Washout

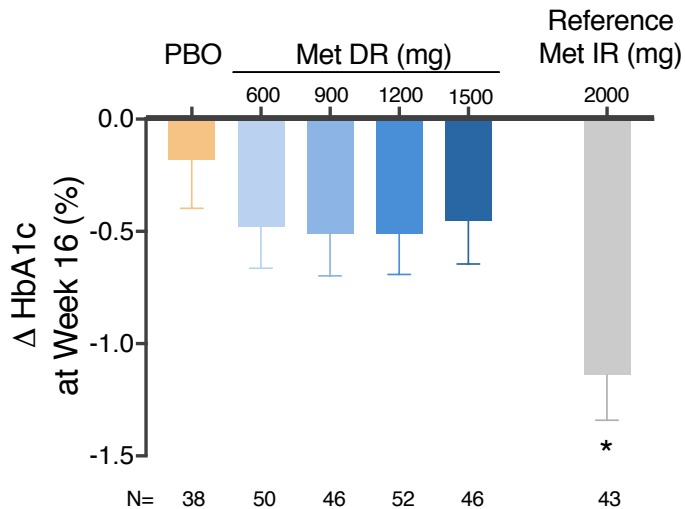

## Washout

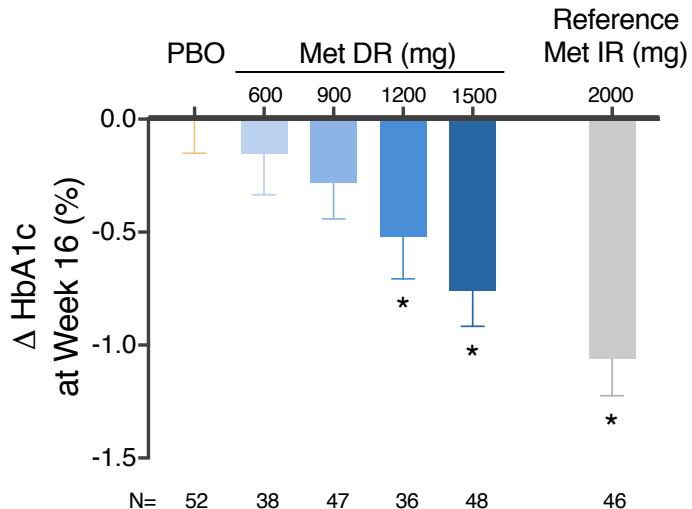

Supplement: pone.0203946.s004.pdf [file pone.0203946.s004.pdf]
